# Supplementary material for: Supersensitive detection of lincomycin with an ECL aptasensor based on the synergistic integration of gold-functionalized upconversion nanoparticles and thiolated 3,4,9,10-perylene tetracarboxylic acid
Source: Royal Society of Chemistry journal article supplement (doi:10.1039/d3an02169f), 2024-01-01
Supplement: d3an02169f1.pdf [file d3an02169f1.pdf]

## Supplementary Information

### **Supersensitive detection of lincomycin with an ECL aptasensor based on the synergistic integration of gold functionalized upconversion nanoparticles and thiolated 3,4,9,10-perylene tetracarboxylic acid**

Xiaohui Chen,<sup>\*a</sup> Jing Wen,<sup>b</sup> Xuelin Shan,<sup>b</sup> Wenchang Wang,<sup>b</sup> and Zhidong Chen<sup>\*b</sup>

<sup>a</sup> *School of Chemistry and Material Engineering, Changzhou Institute of Technology, Changzhou 213032, China. E-mail: chenxh@czu.cn*

<sup>b</sup> *School of Petrochemical and Engineering, Changzhou University, Changzhou 213164, China. E-mail: zdchen@cczu.edu.cn*

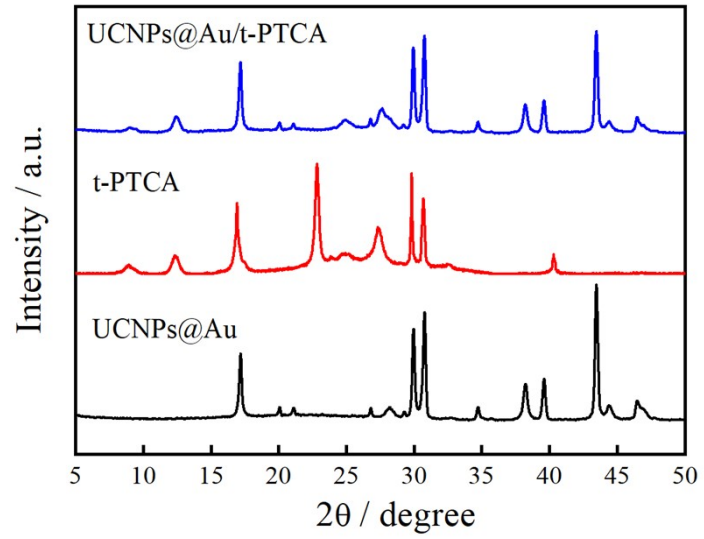

**Fig. S1.** The XRD patterns of UCNPs@Au, t-PTCA, and UCNPs@Au/t-PTCA.

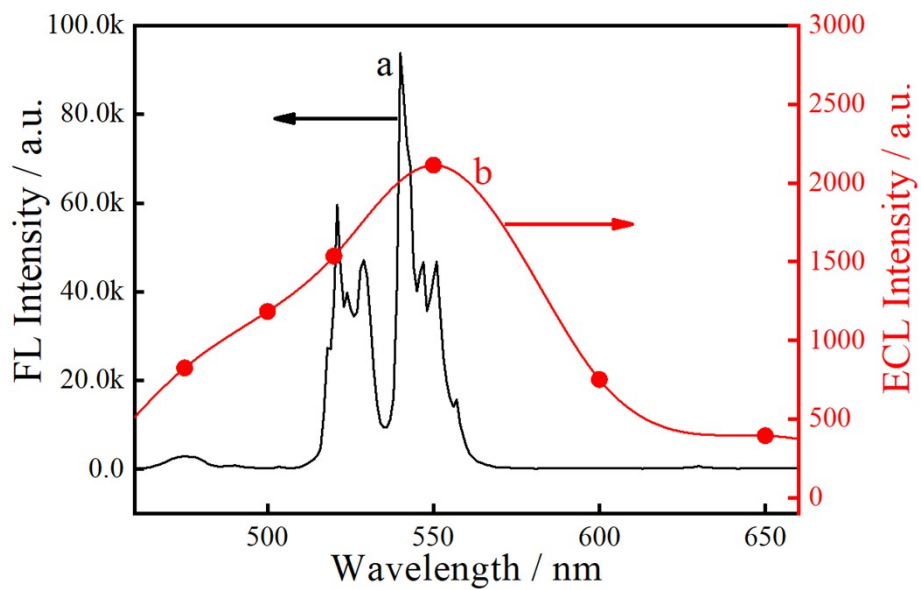

**Fig. S2.** The (a) FL and (b) ECL spectroscopy of UCNPs@Au/t-PTCA/GCE.

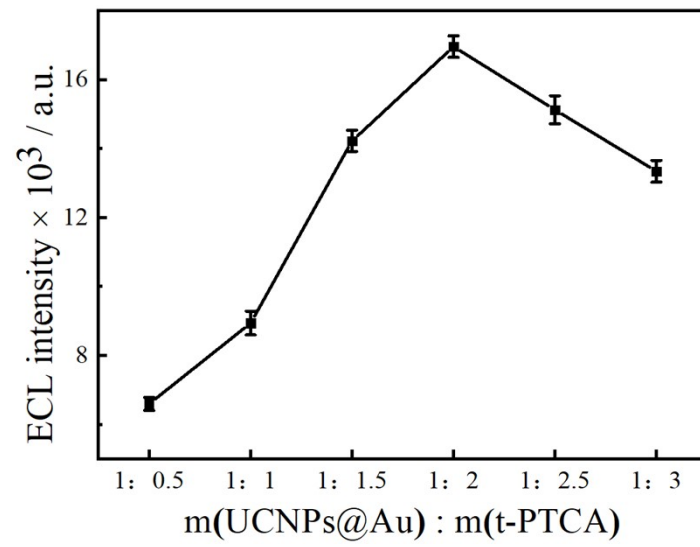

**Fig. S3.** The effects of the ratio of UCNPs@Au to t-PTCA on the ECL intensity of the UCNPs@Au/t-PTCA/GCE.

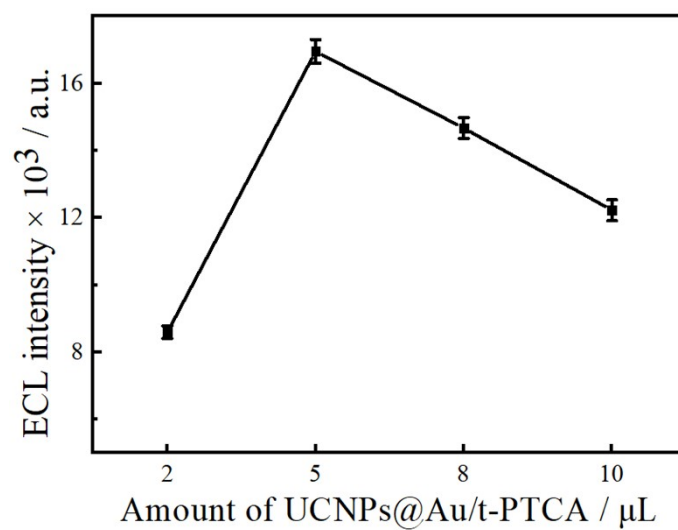

**Fig. S4.** The effects of the amount of UCNPs@Au/t-PTCA on the ECL intensity of the UCNPs@Au/t-PTCA/GCE. UCNPs@Au/t-PTCA concentration: 1.0 mg/mL.

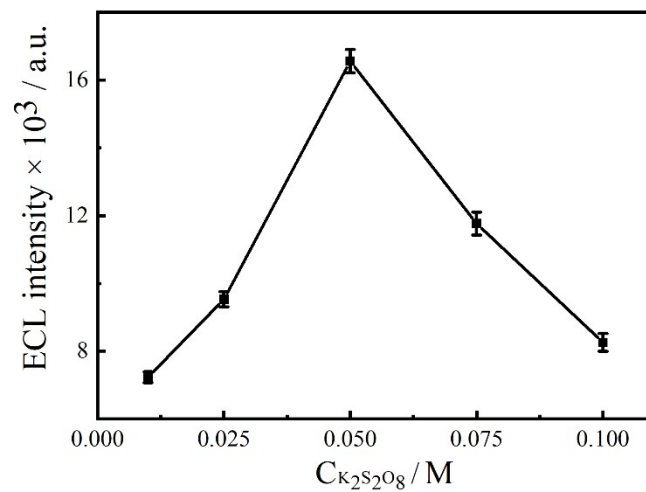

**Fig. S5.** The effects of the  $K_2S_2O_8$  concentration on the ECL intensity of the UCNPs@Au/t-PTCA /GCE.

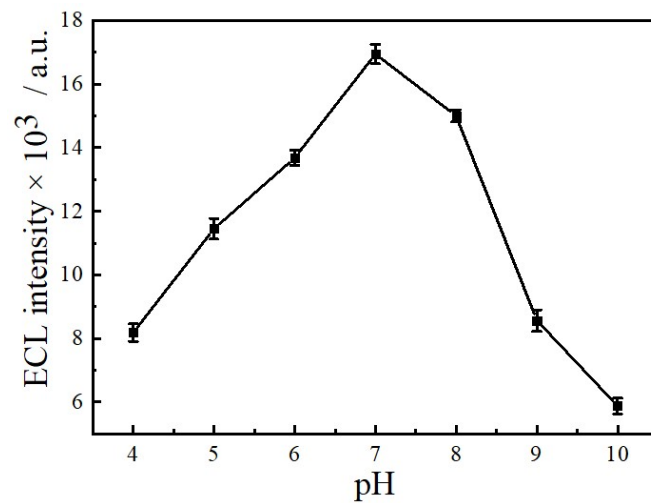

**Fig. S6.** The pH on the ECL intensity of the UCNPs@Au/t-PTCA/GCE in 0.1 M PBS containing 0.05 M  $K_2S_2O_8$ .

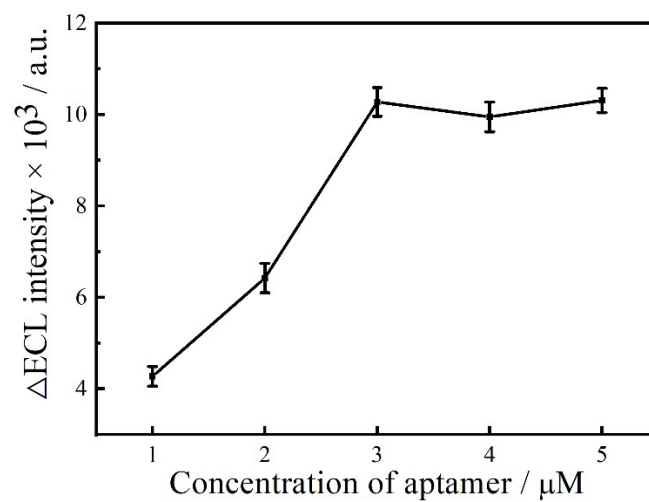

**Fig. S7.** The effects of the concentration of the loaded aptamer on the  $\Delta$ ECL of the apt/UCNPs@Au/t-PTCA/GCE.



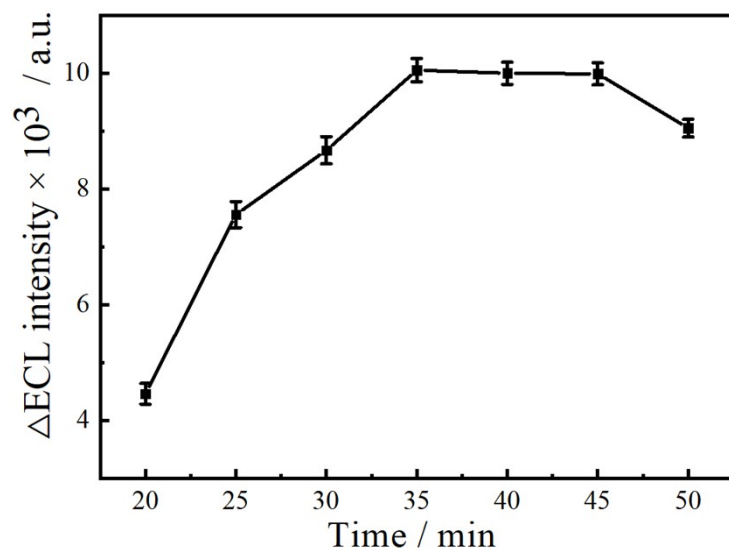

**Fig. S8.** The effects of the binding time of the Lin on the  $\Delta$ ECL of the apt/UCNPs@Au/t-PTCA /GCE.
